# Supplementary material for: Straightforward synthesis of gold nanoparticles by adding water to an engineered small dendrimer
Source: publisher site journal article supplement (doi:10.3762/bjnano.11.95), 2020-07-28
Supplement: Additional file 1 [file 2190-4286-11-95-S1.pdf]

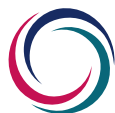

## Supporting Information

for

### **Straightforward synthesis of gold nanoparticles by adding water to an engineered small dendrimer**

Sébastien Gottis, Régis Laurent, Vincent Collière and Anne-Marie Caminade

*Beilstein J. Nanotechnol.* **2020**, *11*, 1110–1118. doi:10.3762/bjnano.11.95

### **Additional HRTEM images and NMR data**

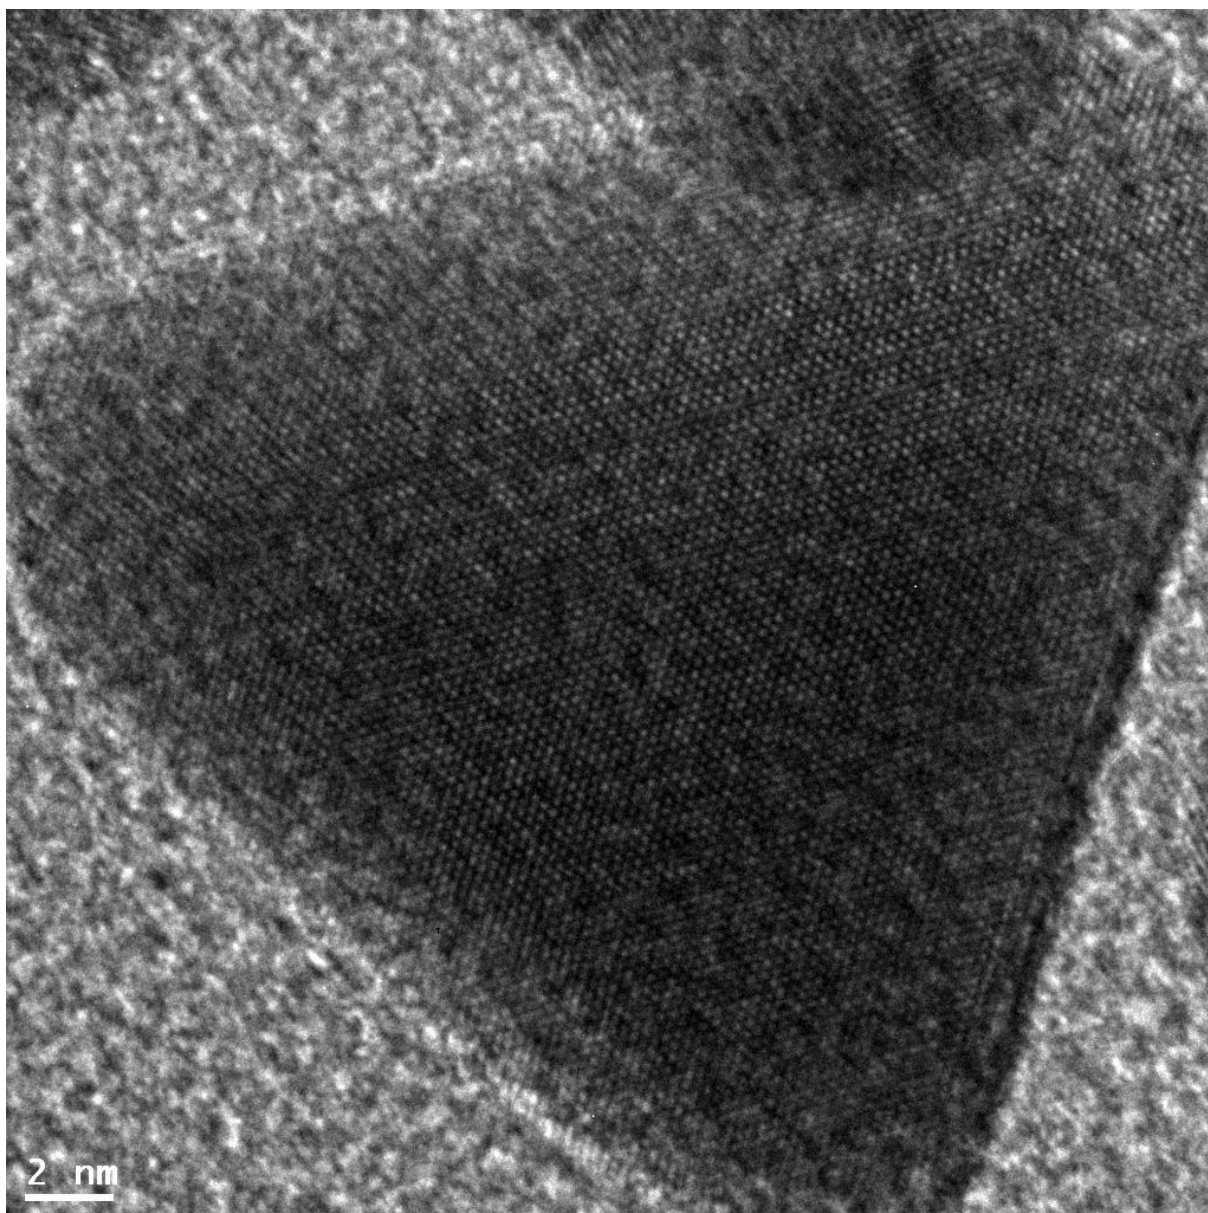

**Figure S1:** HRTEM image of a gold nanoparticle, showing the atomic planes of gold.

## NMR spectra

The  $^{31}\text{P}$ ,  $^1\text{H}$ , and  $^{13}\text{C}$  NMR spectra of all compounds are given in the following Figures. As usual for dendrimer, all compounds contain traces of solvents, which are detected on the  $^1\text{H}$  and  $^{13}\text{C}$  NMR spectra.

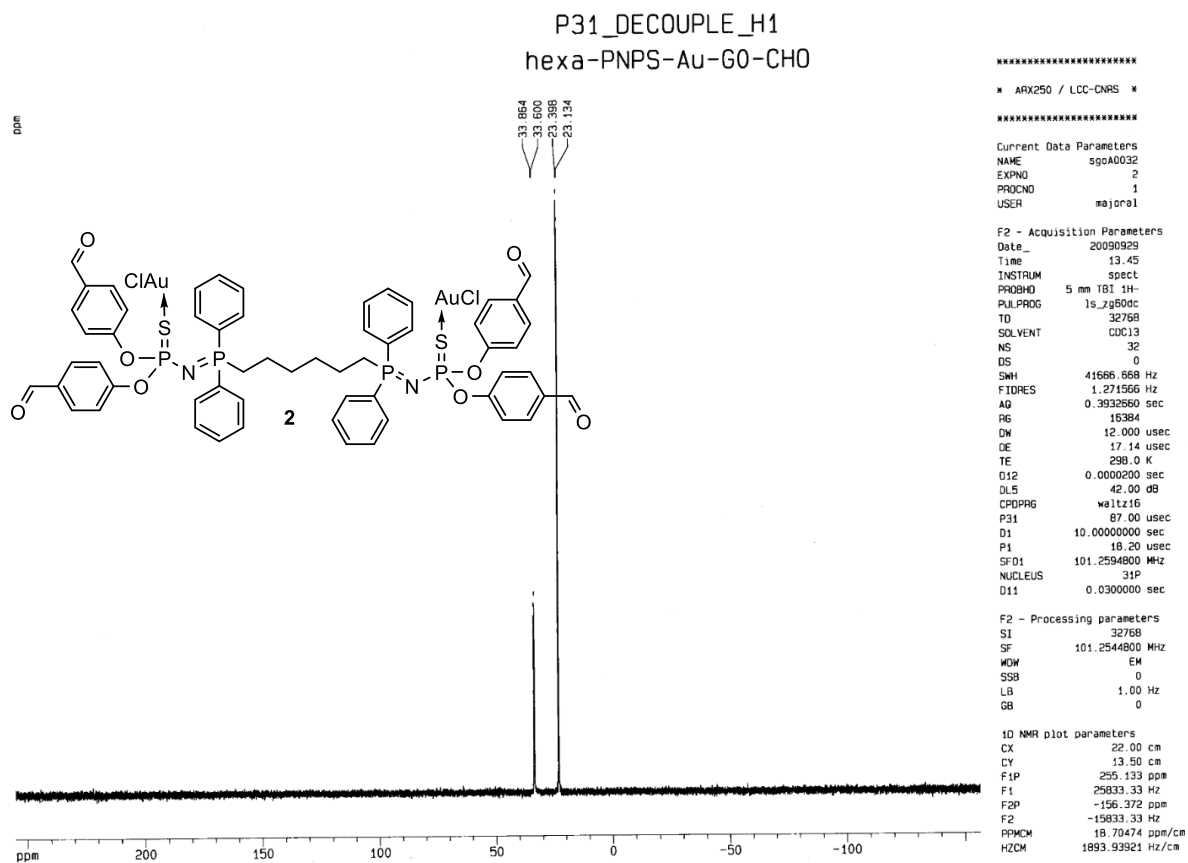

Figure S2:  $^{31}\text{P}$   $\{^1\text{H}\}$  NMR spectrum of compound 2.



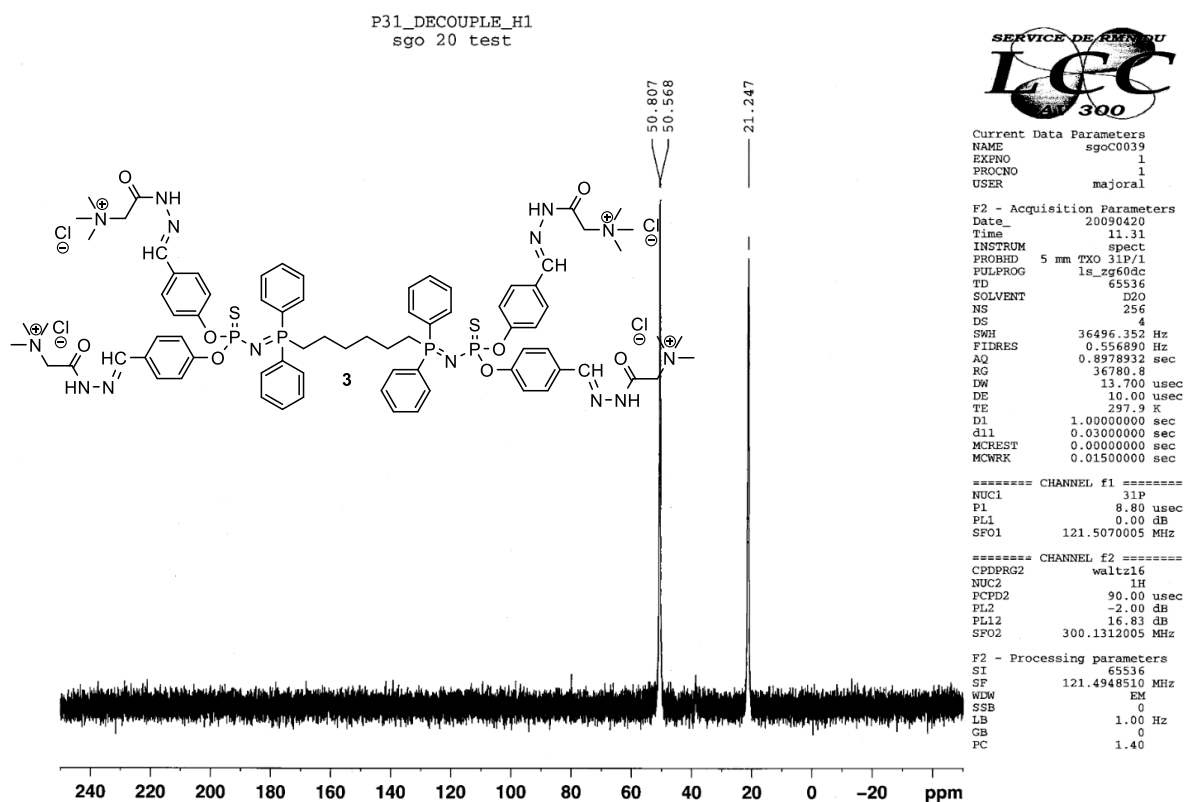

Figure S5:  $^{31}\text{P}$   $\{^1\text{H}\}$  NMR spectrum of compound 3.

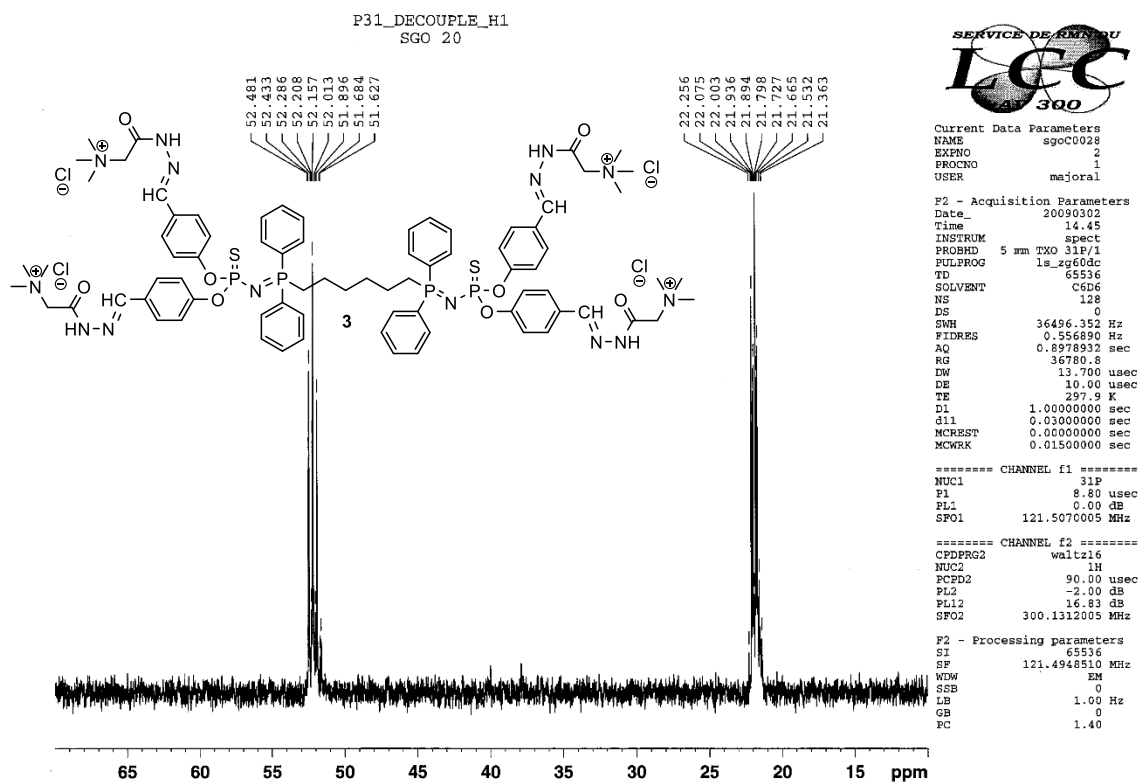

Figure S6:  $^{31}\text{P}$   $\{^1\text{H}\}$  NMR spectrum of compound 3 in DMSO.

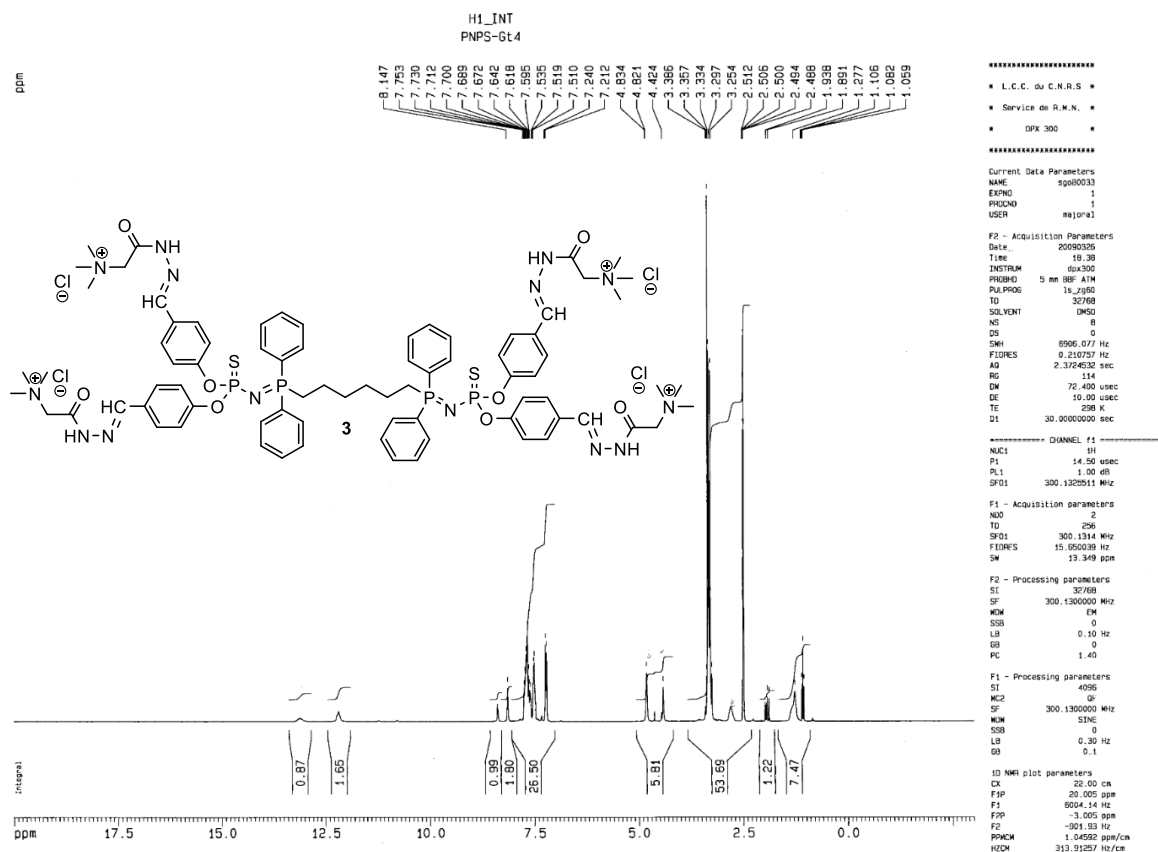

Figure S7:  $^1\text{H}$  NMR spectrum of compound 3.

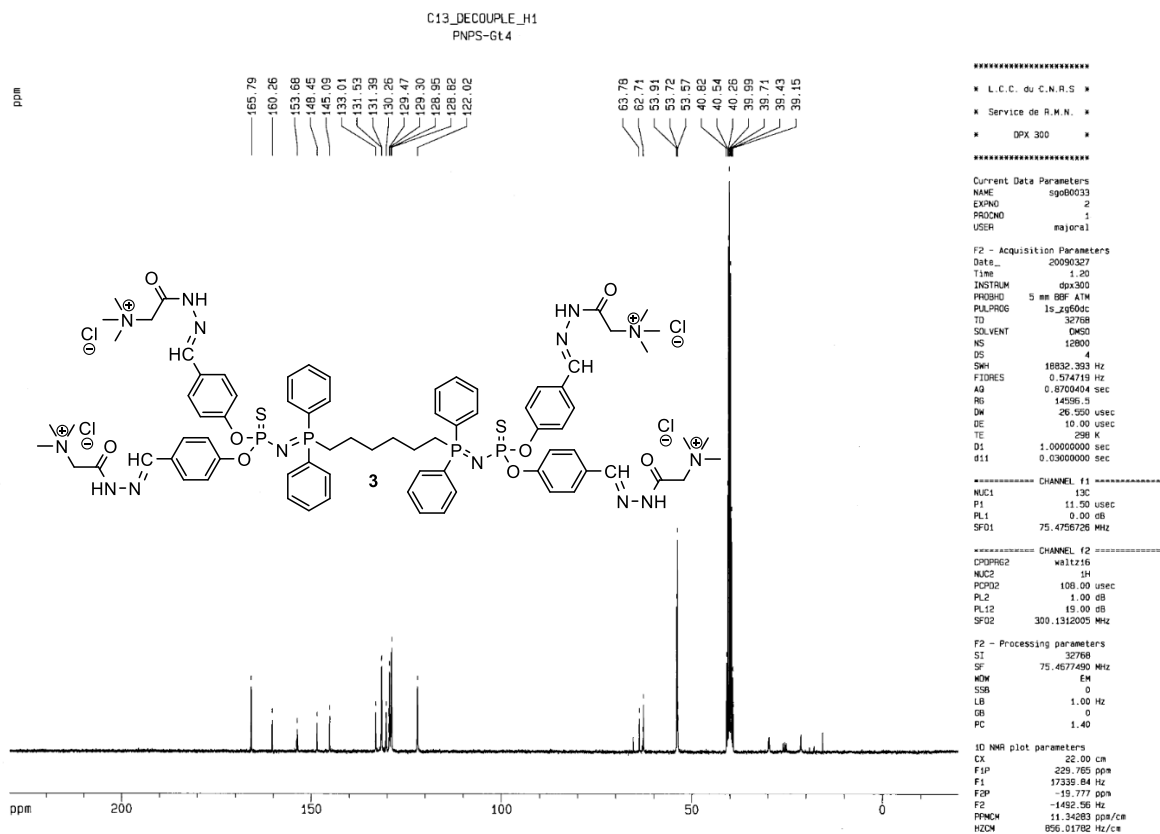

Figure S8:  $^{13}\text{C} \{^1\text{H}\}$  NMR spectrum of compound 3.

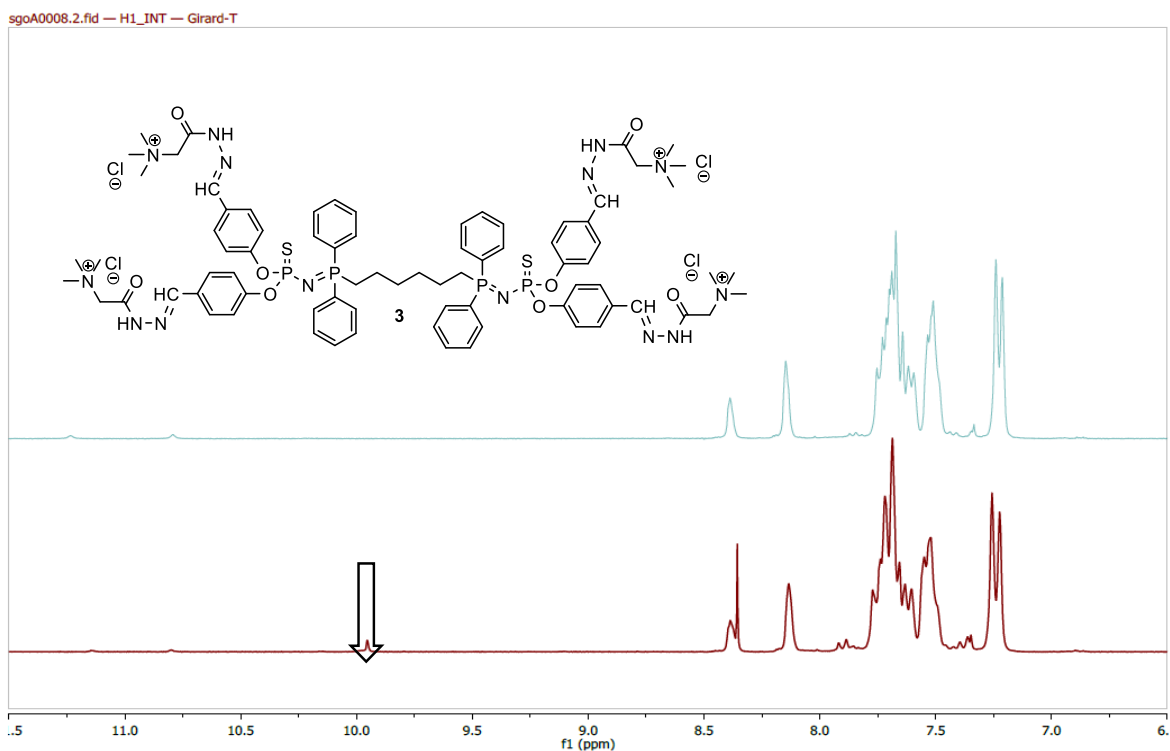

**Figure S9:** Comparison of an enlargement of  $^1\text{H}$  NMR spectra of compound **3** pure (green) and slightly hydrolyzed (red) in DMSO and DMSO containing water, showing in particular the re-appearance of the aldehyde signal (arrow).

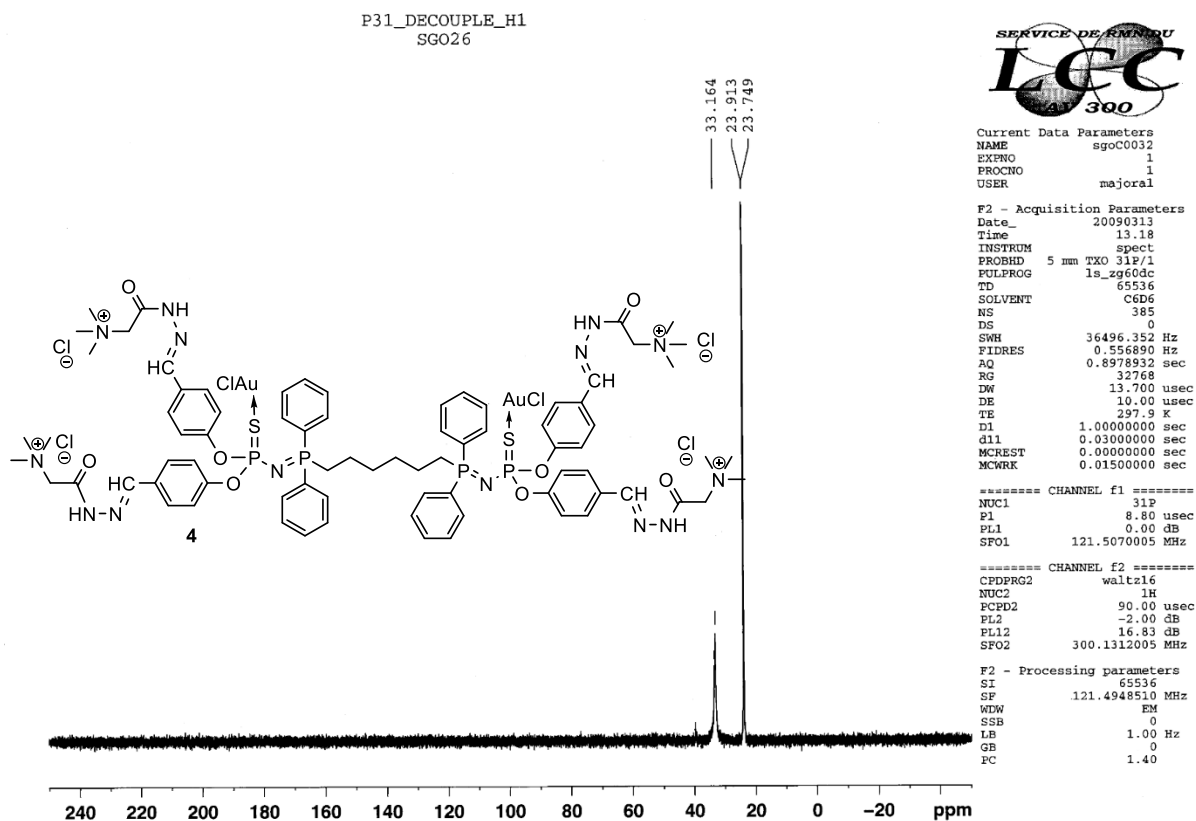

**Figure S10:**  $^{31}\text{P}$   $\{^1\text{H}\}$  NMR spectrum of compound **4**.

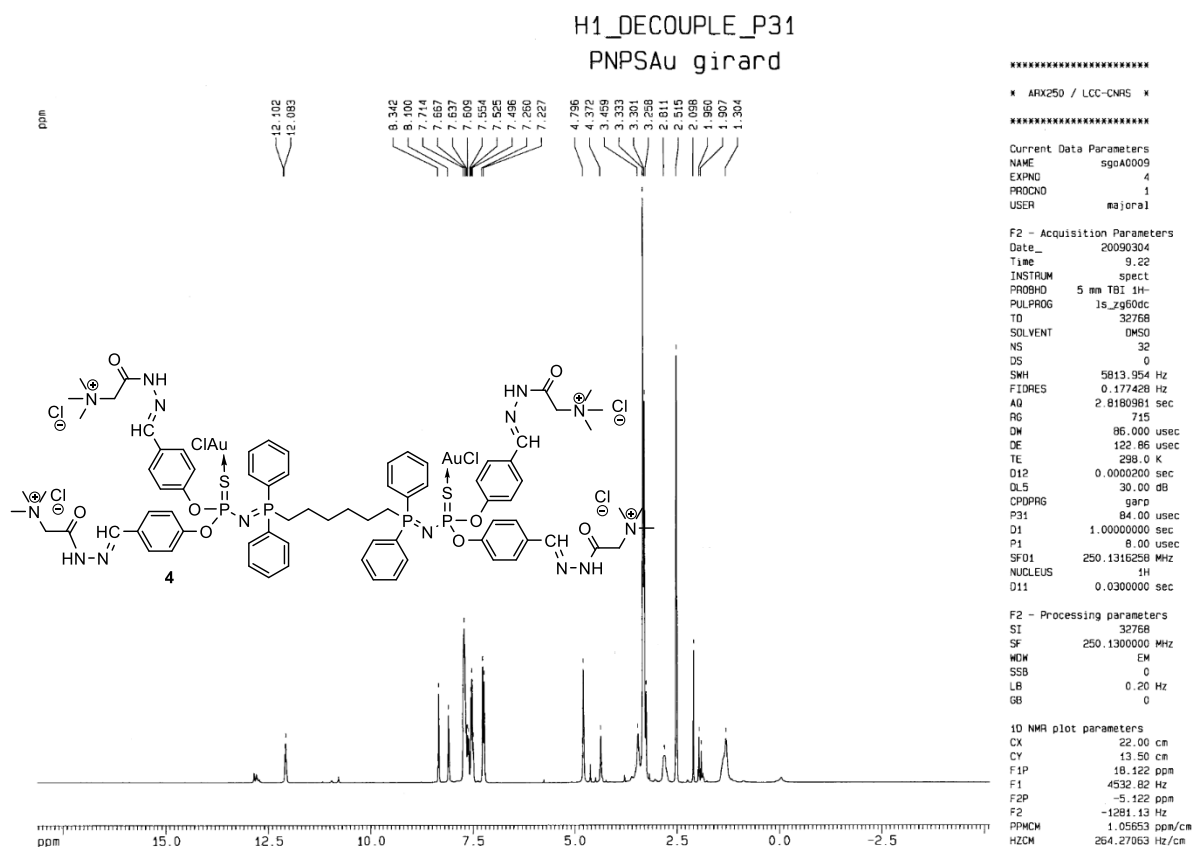

Figure S11:  $^1\text{H}$  NMR spectrum of compound 4.

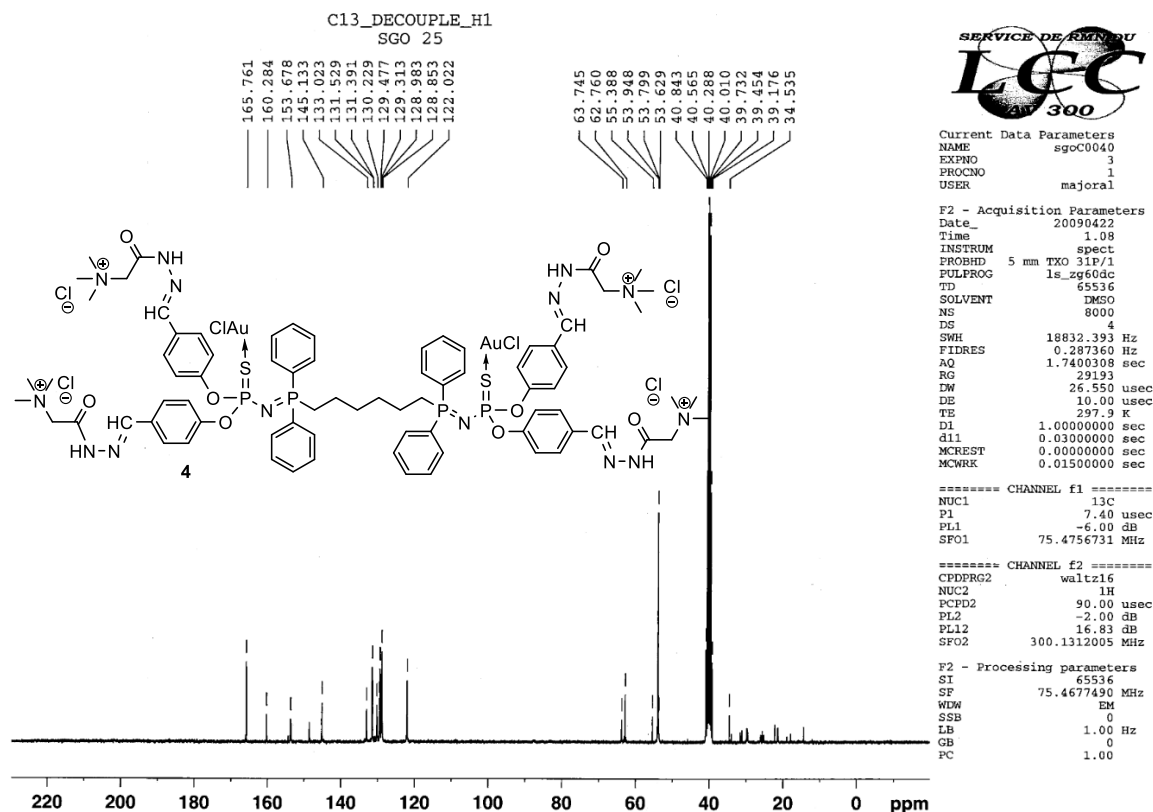

Figure S12:  $^{13}\text{C}$   $\{^1\text{H}\}$  NMR spectrum of compound 4.
